# Supplementary material
Source: Springer Nature journal article supplement (https://www.springermedizin.de/resource/supplementary/13075_2010_9733_MOESM4_ESM.pdf/9693608)

**A**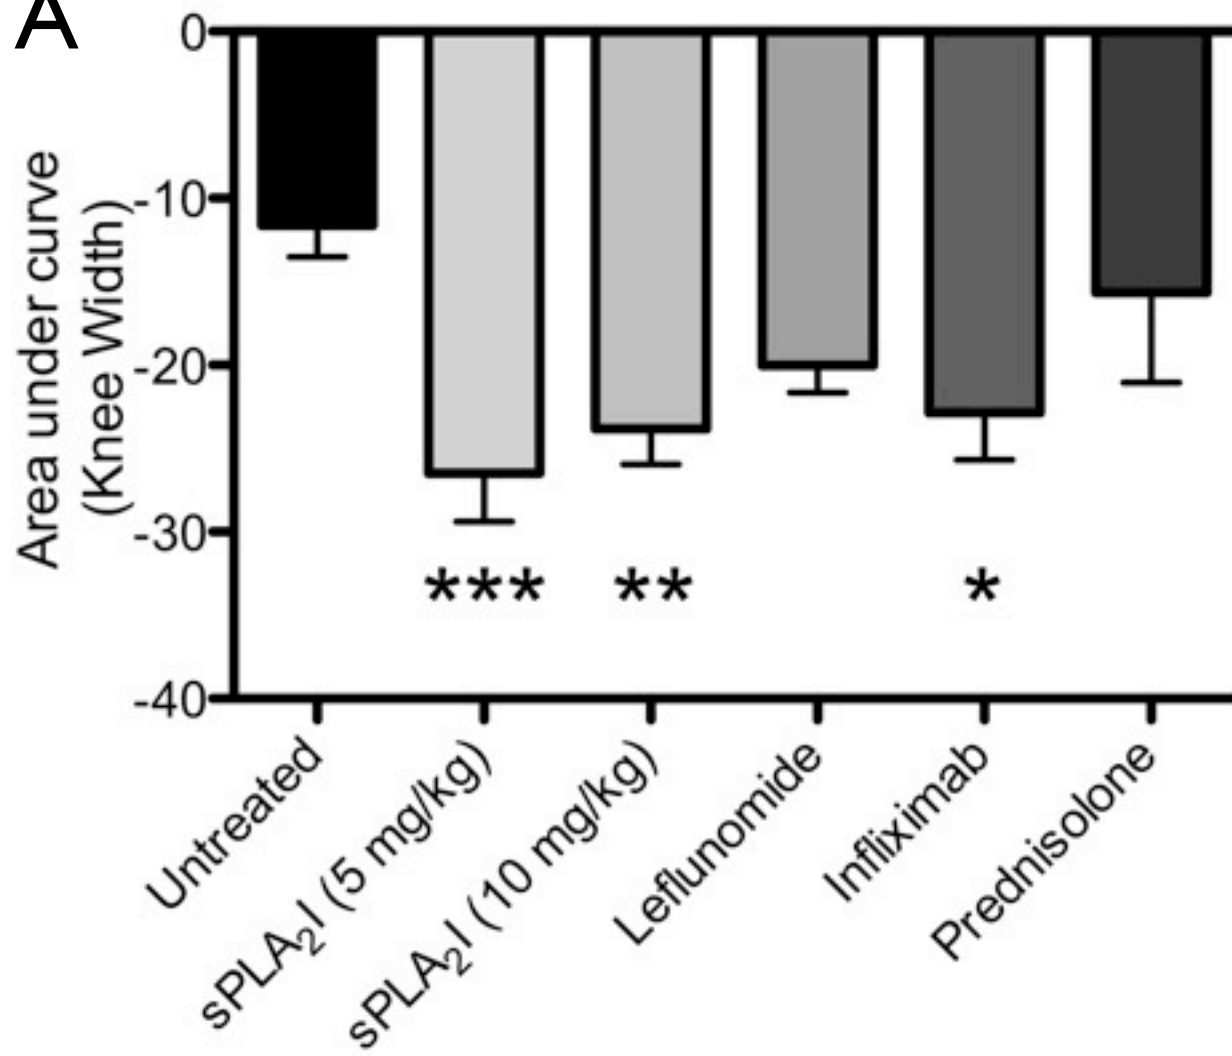**B**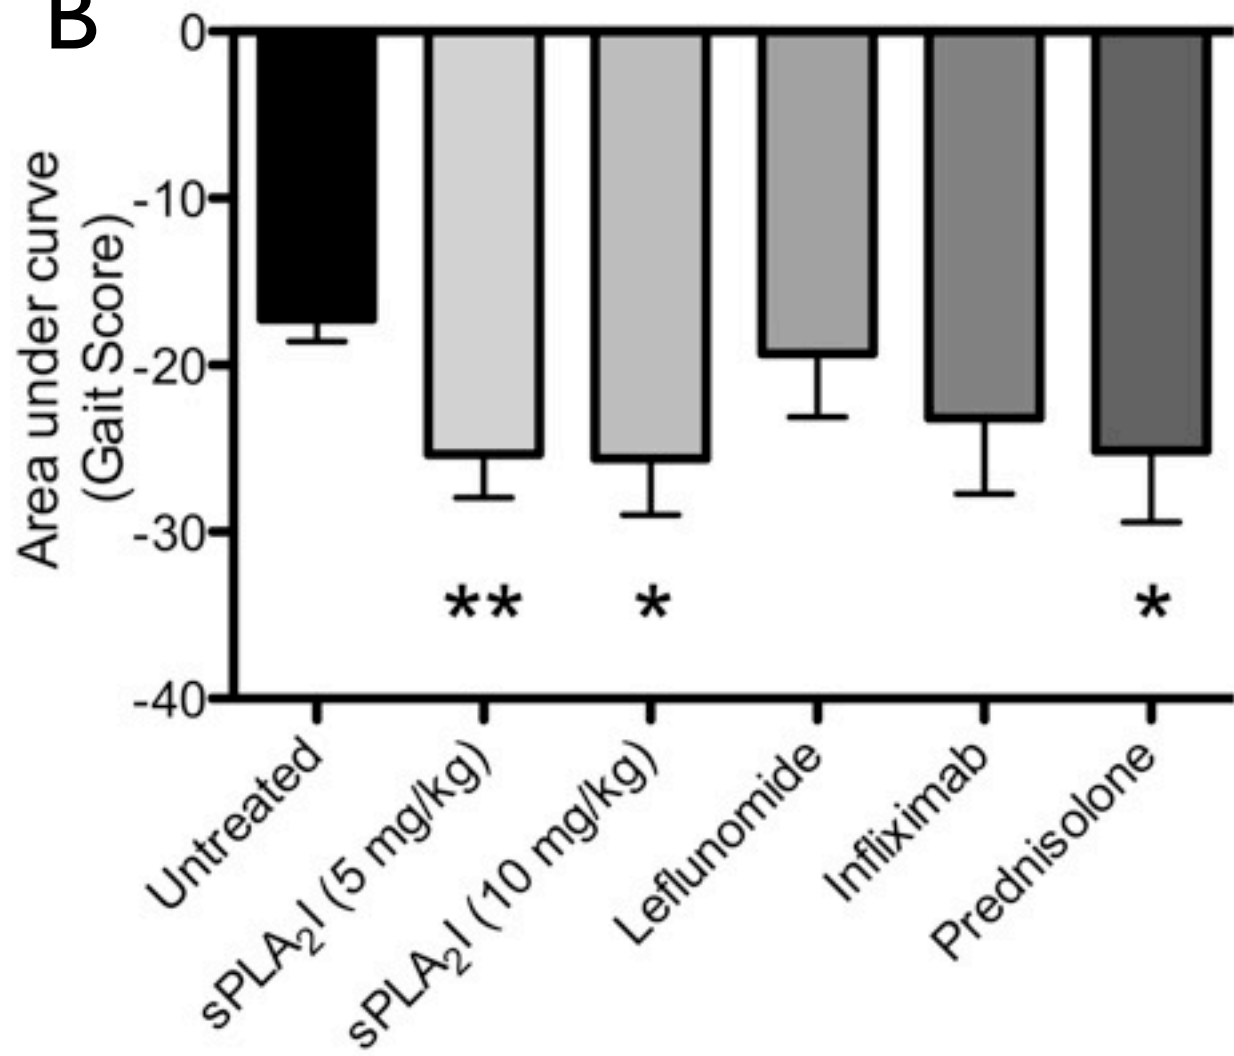

Supplement: MOESM4 [file 9693608]
